# Supplementary material for: Manganese in the west Atlantic Ocean in the context of the first global ocean circulation model of manganese
Source: Copernicus journal article supplement (doi:10.5194/bg-14-1123-2017), 2017-03-09
Supplement: Supplementary file 1 [file README.pdf › Mn_model/README.pdf]

# Documentation for the manganese ocean model

Marco van Hulten

25 November 2016

This document describes how to setup the model that was used in the paper *Manganese in the West Atlantic Ocean in context of the first global ocean circulation model of manganese* by Van Hulten et al. ([arXiv:1606.07128]).

Download revision 7036 of [NEMO](#).

```
$ svn checkout -r 7036 http://forge.ipsl.jussieu.fr/nemo/svn/branches/2015/nemo_v3_6_STABLE
```

A login will be asked that you can create on the [NEMO](#) website.

If exact reproduction is not the ultimate goal, and you rather want to build further upon my model, download the [latest](#) version.

Make a NEMO configuration as described in the [online documentation](#).

The manganese module comes as part of different Fortran 90/95 source code files that are to be found in the Supplementary Material of the paper. Those should be put in `NEMOGCM/CONFIG/*/MY_SRC/` that adds and overrides symlinks in `NEMOGCM/CONFIG/*/WORK/`. The asterisk must be replaced with your configuration name that should be based on `ORCA2_OFF_PISCES`. The forcing files (circulation, dust, rivers and hydrothermal) are as provided in the NEMO 3.6 download.

Both NEMO and the manganese model are available under the [CeCILL](#) licence. The paper and the documentation are licensed under the [Creative Commons Attribution-ShareAlike](#). Note that I am the author of only the manganese code that is enclosed between the `key_mang` preprocessor keys. The models and components NEMO, TOP and PISCES are written by others (references in the paper).
