# Supplementary material for: Manganese in the west Atlantic Ocean in the context of the first global ocean circulation model of manganese
Source: Copernicus journal article supplement (doi:10.5194/bg-14-1123-2017), 2017-03-09
Supplement: Supplementary file [file bg-14-1123-2017-supplement-title-page.pdf › bg-14-1123-2017-supplement-title-page.pdf]

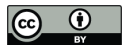

## *Supplement of*

# **Manganese in the west Atlantic Ocean in the context of the first global ocean circulation model of manganese**

**Marco van Hulten et al.**

*Correspondence to:* Marco van Hulten (mvhulten@lsce.ipsl.fr)

- bg-14-1123-2017-supplement-title-page.pdf
- Mn\_model
  - README.md
  - README.pdf
  - code
    - \* p4zmeso.F90
    - \* p4zmicro.F90
    - \* p4zprod.F90
    - \* p4zrem.F90
    - \* p4zsed.F90
    - \* p4zsink.F90
    - \* p4zsms.F90
    - \* par\_mang.F90
    - \* par\_protac.F90
    - \* par\_trc.F90
    - \* sms\_pisces.F90
    - \* trcini.F90
    - \* trcini\_mang.F90
    - \* trcini\_protac.F90
    - \* trcrad.F90
    - \* trcsink.F90
    - \* trcsms.F90
    - \* trcsms\_mang.F90
    - \* trcsms\_protac.F90
    - \* trcwri.F90
    - \* trcwri\_mang.F90

- \* trcwri\_protac.F90
- config
  - \* field\_def.xml
  - \* iodef.xml
  - \* namelist\_cfg
  - \* namelist\_mang
  - \* namelist\_pisces\_cfg
  - \* namelist\_top\_cfg
- cpp\_o2op\_mang.fcm

The copyright of individual parts of the supplement might differ from the CC-BY 3.0 licence.
